# Supplementary material for: Three-dimensional porous metal phosphide cathode electrodes prepared via electroless galvanic modification for alkaline water electrolysis
Source: Royal Society of Chemistry journal article supplement (doi:10.1039/d3se00169e), 2023-01-01
Supplement: d3se00169e1.pdf [file d3se00169e1.pdf]

## Supplementary Information

### Three-Dimensional Porous Metal Phosphide Cathode Electrodes Prepared via Electroless Galvanic Modification for Alkaline Water Electrolysis

Sankar Sasidharan,<sup>1</sup> Rajith Illathvalappil,<sup>1</sup> S. Assa Aravindh,<sup>2</sup> Hidenori Kuroki,<sup>1</sup> Gopinathan  
M. Anilkumar,<sup>1,3</sup> Takeo Yamaguchi<sup>1\*</sup>

<sup>1</sup>Laboratory for Chemistry and Life Science, Tokyo Institute of Technology, R1-17, 4259  
Nagatsuta, Midori-ku, Yokohama, Japan 226-8503

\*E-mail: [yamag@res.titech.ac.jp](mailto:yamag@res.titech.ac.jp)

<sup>2</sup>Nano and Molecular Systems Research Unit (NANOMO), Pentti Kaiteran katu 1,  
Linnanmaa, University of Oulu, Oulu- 90014, Finland

<sup>3</sup>R&D Centre, Noritake Co., Ltd., 300 Higashiyama, Miyochi-cho, Miyoshi 470-0293, Japan

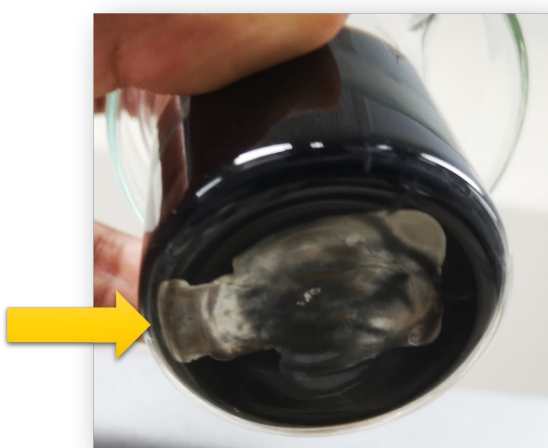

**Figure S1.** Photograph showing the deposition of Ni particles after the galvanic replacement by Ru on the nickel foam (NF) surface after 24 h immersion in RuCl<sub>3</sub> solution.

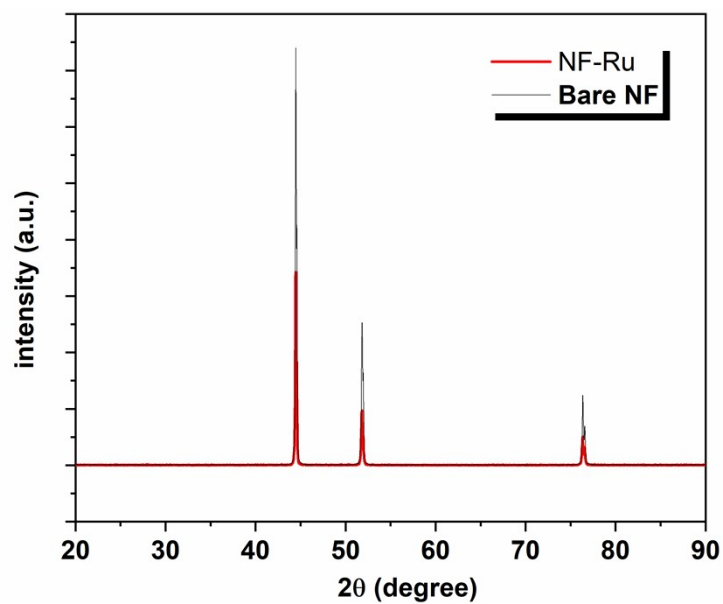

**Figure S2.** XRD patterns for NF-Ru in comparison with bare NF

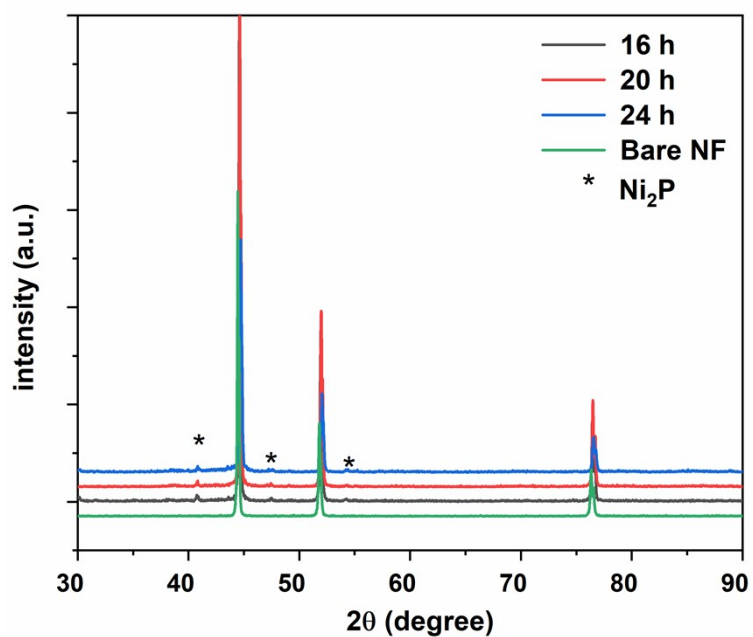

**Figure S3.** XRD patterns for  $\text{Ni}_2\text{P}$ -Ru/NF developed after keeping the NF in  $\text{RuCl}_3$  solution at different times (3, 16, 20 and 24 h).

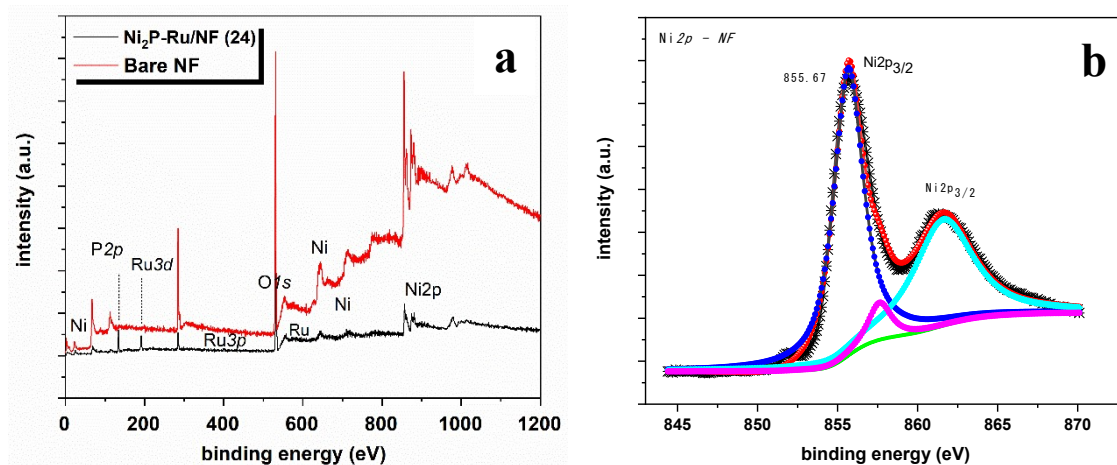

**Figure S4.** a) XPS survey spectra for Ni<sub>2</sub>P-Ru/NF (24 h) and bare NF. b) XPS deconvoluted spectrum for Ni 2p (bare NF).

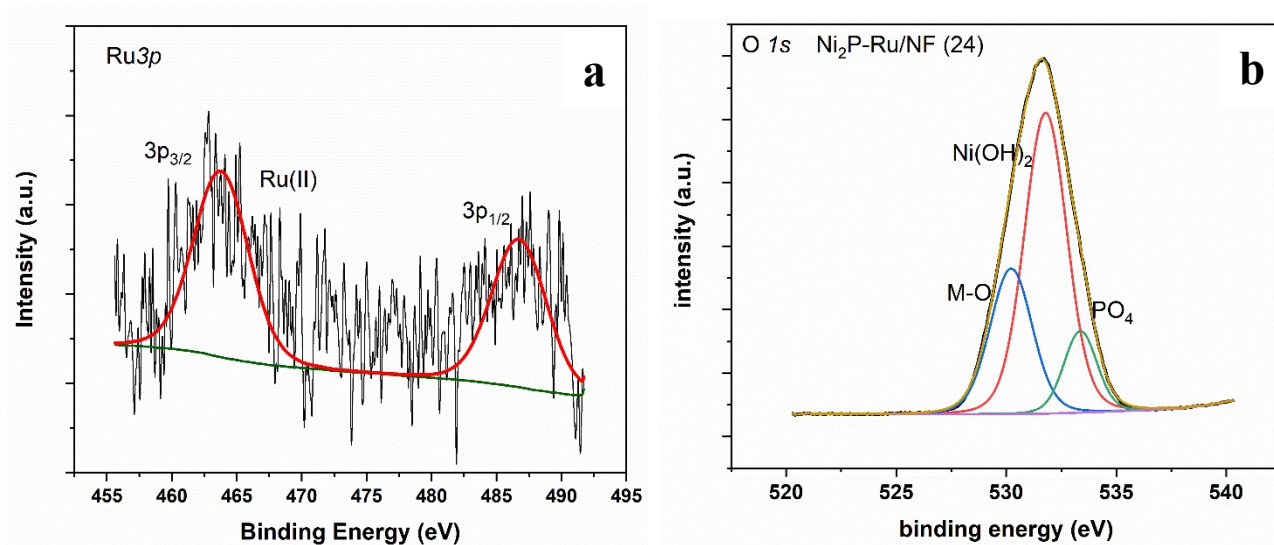

**Figure S5.** XPS deconvoluted spectra for Ni<sub>2</sub>P-Ru/NF (24 h): a) Ru 3p and b) O 1s.

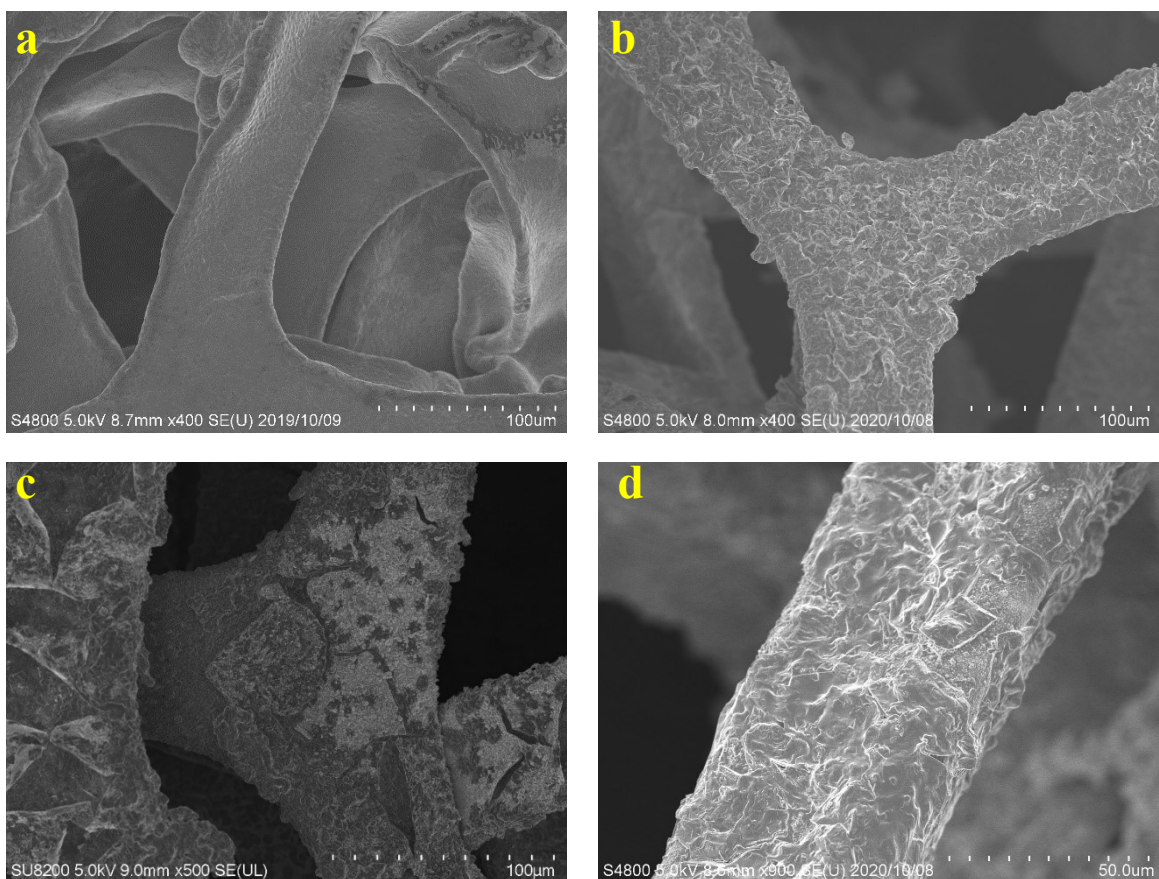

**Figure S6.** SEM micrographs of **a)** bare NF and **b-d)** Ni<sub>2</sub>P-Ru/NF (24 h) catalysts.

| Catalyst                       | Immersion time<br>in RuCl <sub>3</sub> solution<br>(h) | Overpotential<br>at 10/20 mA cm <sup>-2</sup><br>(mV) |
|--------------------------------|--------------------------------------------------------|-------------------------------------------------------|
| Ni <sub>2</sub> P-Ru/NF (3 h)  | 3                                                      | 113/145                                               |
| Ni <sub>2</sub> P-Ru/NF (16 h) | 16                                                     | 92/114                                                |
| Ni <sub>2</sub> P-Ru/NF (20 h) | 20                                                     | 69/88                                                 |
| Ni <sub>2</sub> P-Ru/NF (24 h) | 24                                                     | 40/60                                                 |
| Bare NF                        | –                                                      | 329/364                                               |
| Ni <sub>2</sub> P/NF           | –                                                      | 290/316                                               |
| Pt-Ru/C                        | –                                                      | 23/28                                                 |

**Table S1.** HER performance for the different catalysts in the study.

**Table S2.** Comparison of the alkaline HER performance of Ni<sub>2</sub>P-Ru/NF (24 h) with recent literature on Ru- and Ni-based catalysts in 1 M KOH solution.

| Catalyst                                               | Current density (mA cm <sup>-2</sup> ) | Overpotential (mV) | Reference    |
|--------------------------------------------------------|----------------------------------------|--------------------|--------------|
| Ni <sub>2</sub> P-Ru/NF (24 h)                         | 100                                    | 107                | Present work |
| Ni <sub>2</sub> P-Ru/NF (24 h)                         | 10                                     | 40                 | Present work |
| Ru-S-2/C                                               | 10                                     | 40                 | 1            |
| RuP <sub>2</sub> @NPC                                  | 10                                     | 52                 | 2            |
| Ru@C <sub>2</sub> N                                    | 10                                     | 17                 | 3            |
| RuSi                                                   | 10                                     | 37                 | 4            |
| Ru <sub>2</sub> P                                      | 10                                     | 57                 | 5            |
| Ru-Ru <sub>2</sub> P@PC                                | 10                                     | 43.4               | 6            |
| P-Ru/C                                                 | 10                                     | 31                 | 7            |
| S-RuP@NPSC-900                                         | 10                                     | 92                 | 8            |
| Ru/CoO                                                 | 10                                     | 55                 | 9            |
| Ru <sub>1</sub> CoP/CDs-1000                           | 10                                     | 51                 | 10           |
| Ru SAs-Ni <sub>2</sub> P NPs                           | 10                                     | 57                 | 11           |
| NiRu <sub>0.13</sub> -BDC                              | 10 <sup>2</sup>                        | 34                 | 12           |
| NiCoDPA                                                | 10                                     | 112                | 13           |
| Ni-Fe/NiMoN <sub>x</sub> /NF                           | 20                                     | 49                 | 14           |
| NiFeOOH/NF                                             | 10                                     | 145                | 15           |
| Ru/Ni <sub>2</sub> P/NF                                | 100                                    | 130                | 16           |
| RuCoP/NF                                               | 10                                     | 44                 | 17           |
| CeO <sub>x</sub> -NiB@NF                               | 10                                     | 19                 | 18           |
| Co <sub>2</sub> Fe-P                                   | 10                                     | 48                 | 19           |
| Cu <sub>2</sub> S/Ni <sub>3</sub> S <sub>2</sub> /NF-3 | 10                                     | 50                 | 20           |
| CoS <sub>2</sub> -2                                    | 10                                     | 288                | 21           |

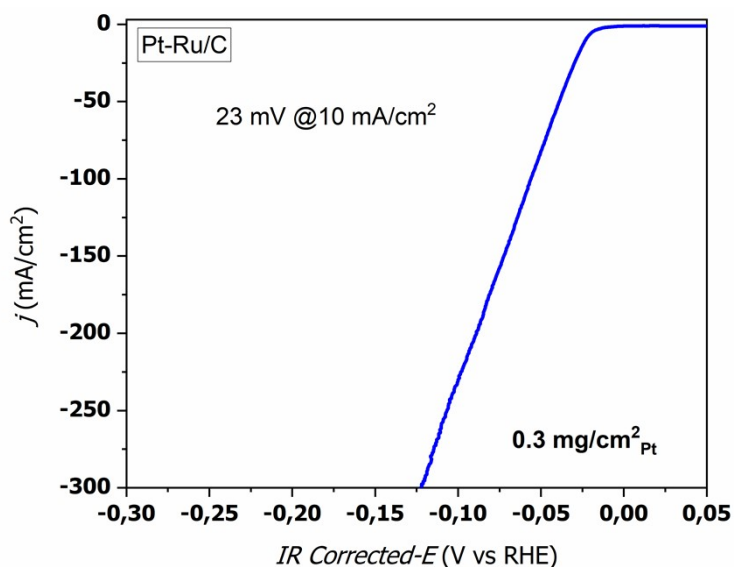

**Figure S7.** HER curve recorded for PtRu/C in  $N_2$  saturated 1M KOH solution.

**Table S3.** Comparison of the OWS performance of  $IrO_2/NF||Ni_2P-Ru/NF$  with recent reports in 1 M KOH electrolyte solution.

| Anode  Cathode                                       | Current density<br>( $mA\ cm^{-2}$ ) | Potential<br>(V) | Reference    |
|------------------------------------------------------|--------------------------------------|------------------|--------------|
| <b><math>IrO_2/NF  Ni_2P-Ru/NF</math></b>            | 10                                   | 1.6              | Present work |
| <b><math>RuCoP/NF  RuCoP/NF</math></b>               | 10                                   | 1.533            | 21           |
| <b><math>IrO_2@MnO_2/rGO  IrO_2@MnO_2/rGO</math></b> | 10                                   | 1.6              | 22           |
| $NiV/Ir\ LDH  NiV/Ir\ LDH$                           | 10                                   | 1.49             | 23           |
| <b><math>IrNi/NF  IrNi/NF</math></b>                 | 10                                   | 1.6              | 24           |
| <b><math>Ni-S-Se/NF  Ni-S-Se/NF</math></b>           | 10                                   | 1.57             | 25           |
| <b><math>Ni_2P-CuP_2/NF  Ni_2P-CuP_2/NF</math></b>   | 10                                   | 1.45             | 26           |
| <b><math>NiFeOOH/NF  NiFeOOH/NF</math></b>           | 10                                   | 1.59             | 27           |
| <b><math>LSC/K-MoSe_2  LSC/K-MoSe_2</math></b>       | 10                                   | 1.59             | 28           |
| <b><math>Co_2Fe-P  Co_2Fe-P</math></b>               | 10                                   | 1.54             | 19           |
| <b><math>Ir_1@Co/NC  Ir_1@Co/NC</math></b>           | 10                                   | 1.61             | 29           |
| <b><math>MnO_2/Co_3O_4  MnO_2/Co_3O_4</math></b>     | 10                                   | 1.66             | 30           |

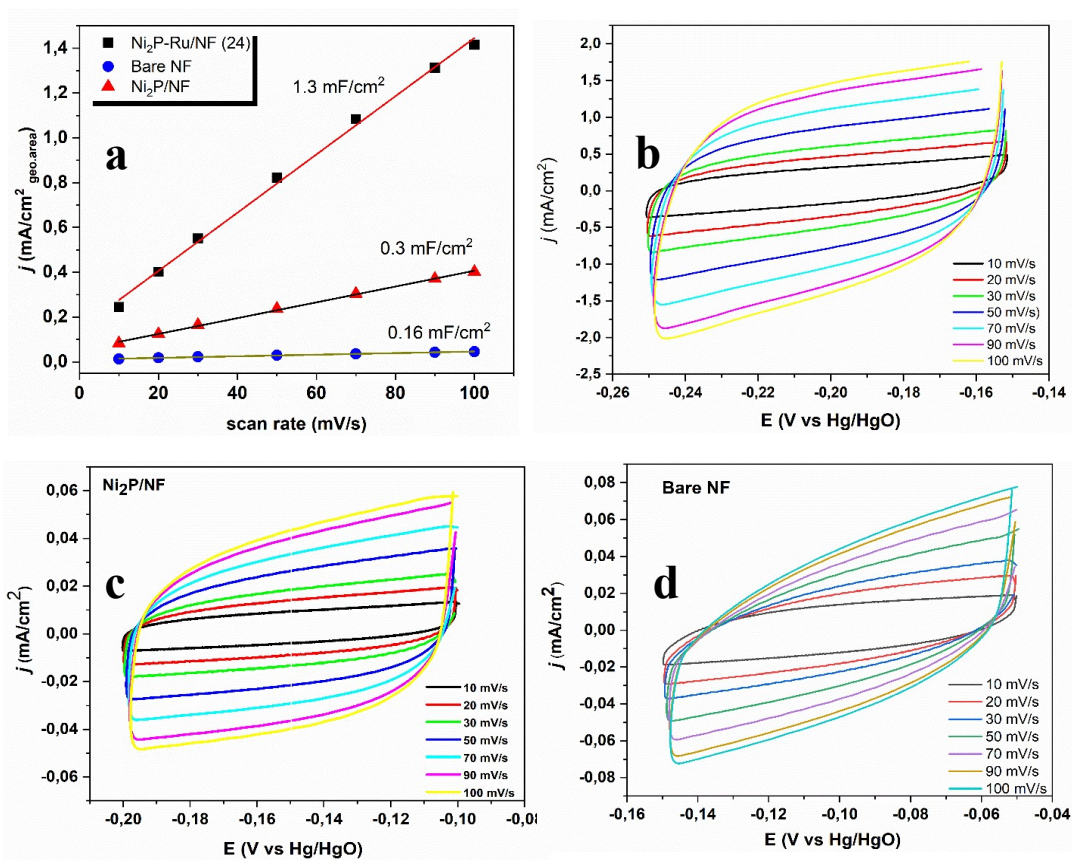

**Figure S8.** a) Linear fitting of current density vs scan rate showing the  $C_{dl}$  for bare NF, Ni<sub>2</sub>P/NF and Ni<sub>2</sub>P-Ru/NF (24 h) catalysts. CV curves for the different catalysts at varying scan rates for b) Ni<sub>2</sub>P-Ru/NF, c) Ni<sub>2</sub>P/NF, and d) bare NF.

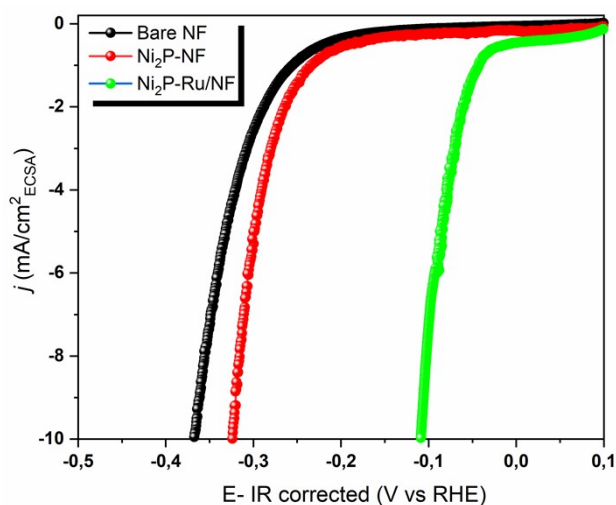

**Figure S9.** HER LSV curves normalized with ECSA for the Ni<sub>2</sub>P-Ru/NF (24 h, 400 μm) along with bare NF (400 μm) and control sample of Ni<sub>2</sub>P/NF (400 μm) in N<sub>2</sub>-saturated 1 M KOH solution.

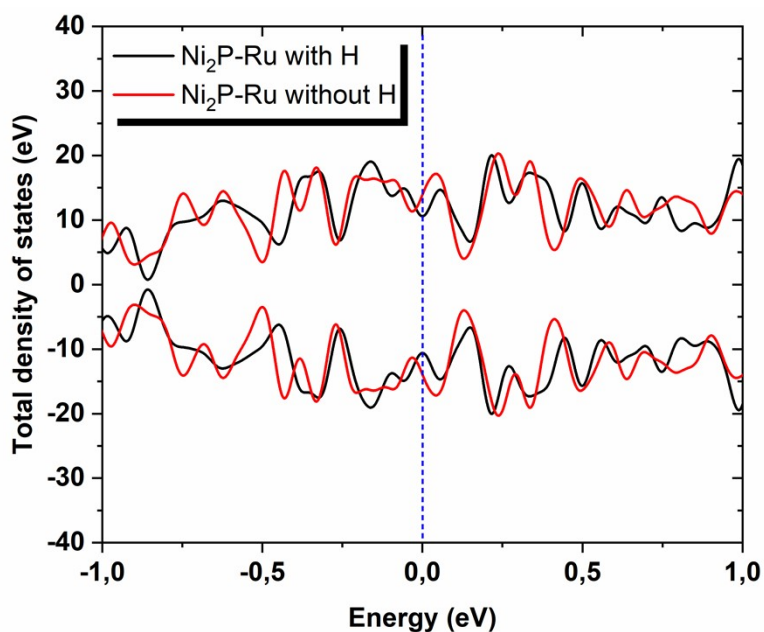

**Figure S10.** Total density of states (DOS) calculated for Ni<sub>2</sub>P-Ru without and with H\* adsorption (The values shown correspond to spin down and up states).

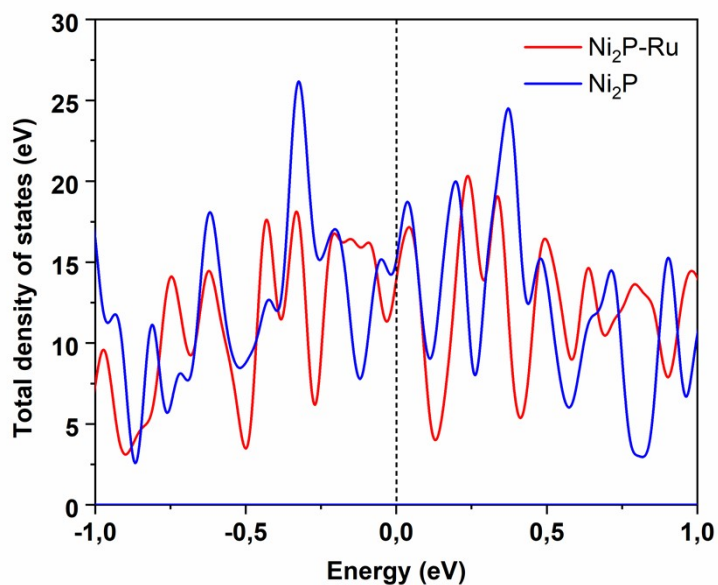

**Figure S11.** Total DOS calculated for Ni<sub>2</sub>P and Ni<sub>2</sub>P-Ru with the values shown corresponding to spin up states.



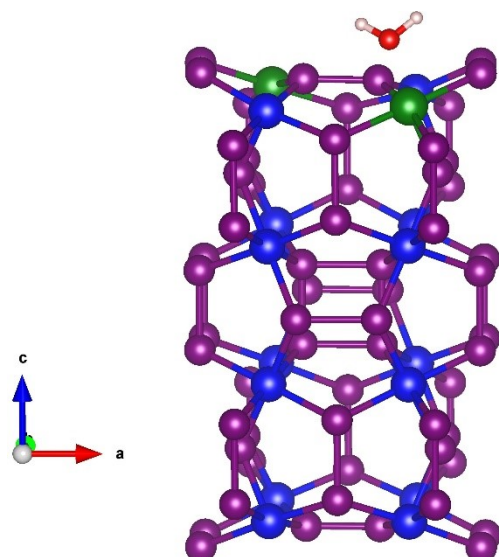

**Figure S12.** Optimized structure of Ni<sub>2</sub>P-Ru after H<sub>2</sub>O\* adsorption.

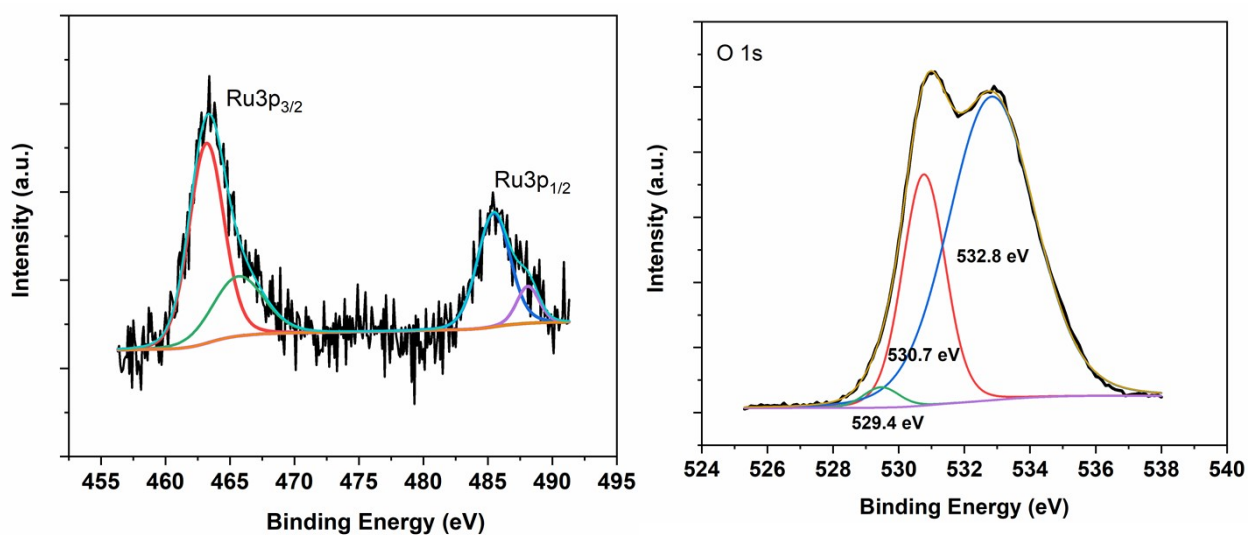

**Figure S13.** XPS deconvoluted spectra of **a)** Ru3p and **b)** O1s for Ni<sub>2</sub>P-Ru/NF (24 h) after the HER durability test.

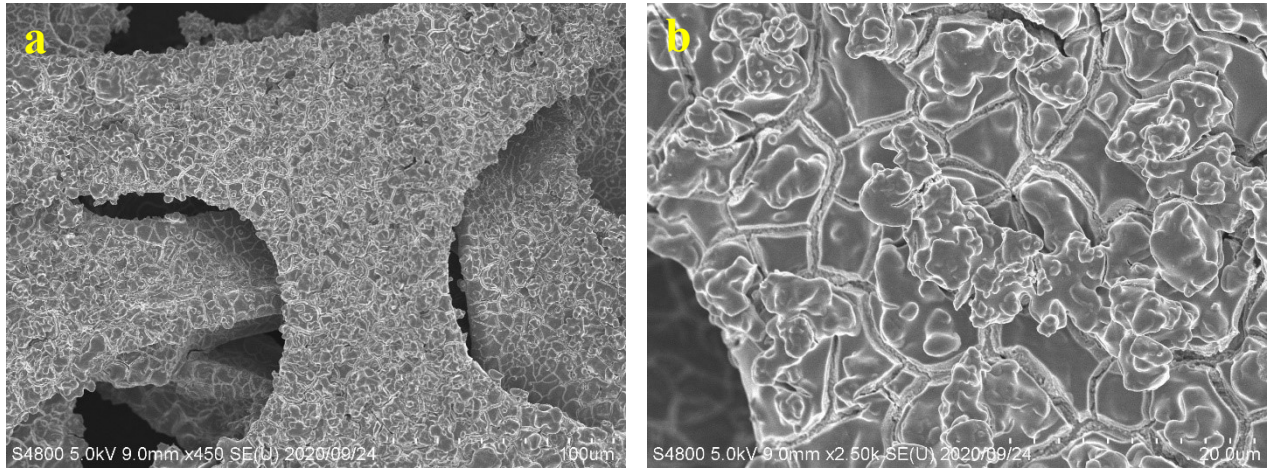

**Figure S14.** SEM images after the durability test for Ni<sub>2</sub>P-Ru/NF (24 h).

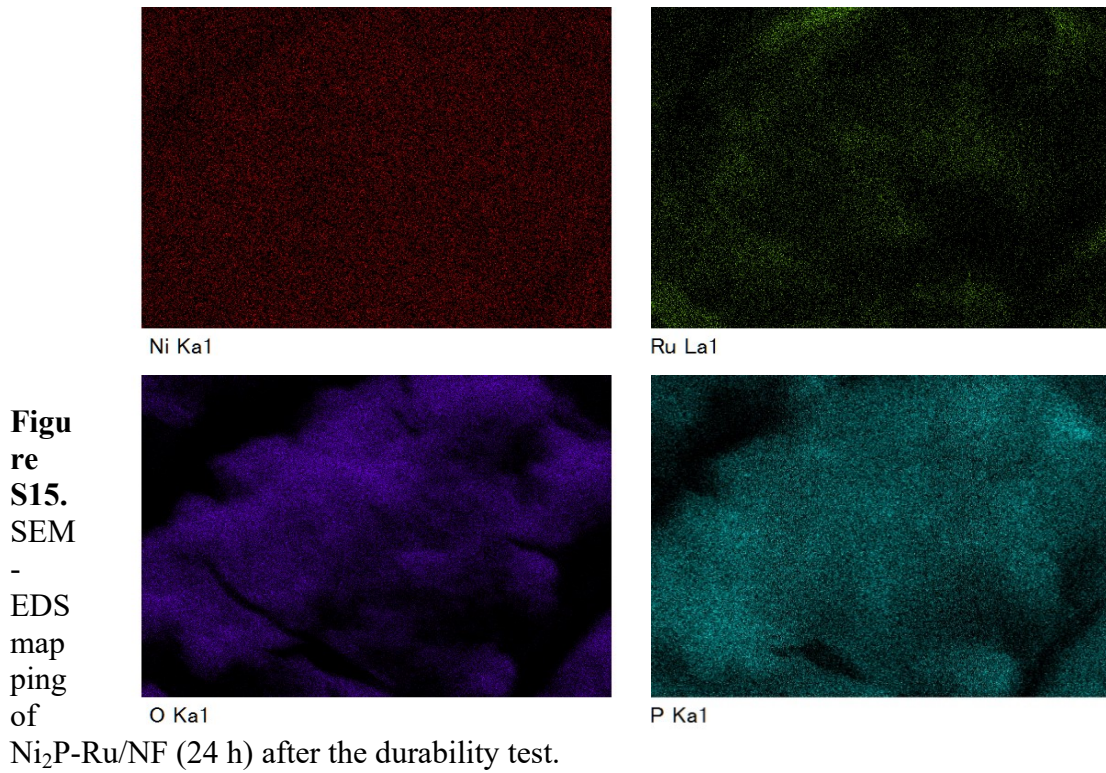

**Table S4.** The H\* adsorption energy ( $\Delta G_{H^*}$  in eV) on different surfaces: Ru(001), N and P site of Ni<sub>2</sub>P-Ru, Pt(111) site of Pt/C and PtRu/C, along with Ru site of PtRu/C. The distances (in Å) of interaction between hydrogen atom (H) and the different sites.

| Configuration                     | Adsorption energy of H, $\Delta G_{H^*}$ (eV) | H distance from surface (Å) |
|-----------------------------------|-----------------------------------------------|-----------------------------|
| Ni <sub>2</sub> P-H<br>H on Ni    | -1.28                                         | Ni-H: 1.4846                |
| Ni <sub>2</sub> P-Ru-H<br>H on Ru | 0.128                                         | Ru-H: 1.6528                |
| Ni <sub>2</sub> P-Ru-H<br>H on Ni | 0.425                                         | Ni-H: 1.48                  |
| Ni <sub>2</sub> P-Ru-H<br>H on P  | -0.131                                        | P-H: 1.43                   |
| Pt (111)-C-H<br>H on Pt           | 0.122                                         |                             |
| Pt(111)-Ru-C-H<br>H on Pt         | -0.678                                        | Pt-H: 1.88                  |
| Pt(111)-Ru-C-H<br>H on Ru         | -1.955                                        | Ru-H: 1.66                  |

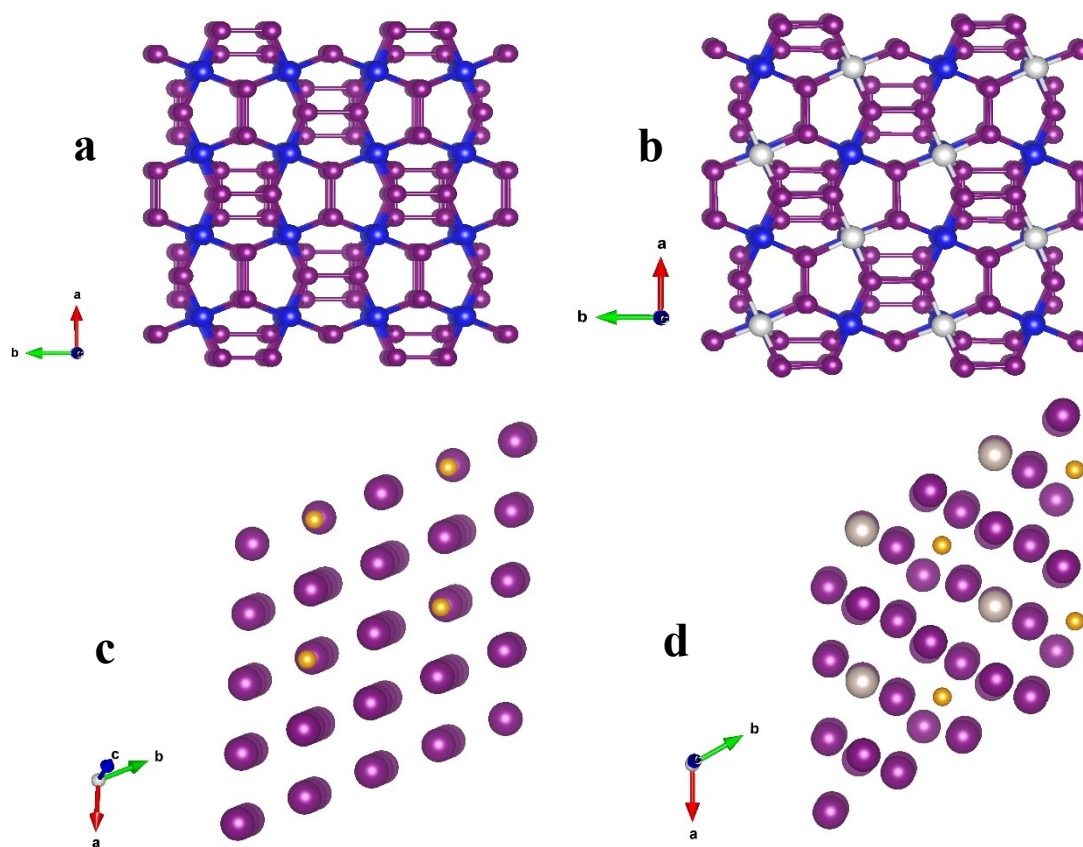

**Figure S16.** Modelled catalyst systems for the DFT studies: **a)** Ni<sub>2</sub>P (Purple : Ni, Blue : P), **b)** Ni<sub>2</sub>P-Ru (Purple : Ni, Blue : P, Grey : Ru), **c)** Pt/C ((Purple : Pt, Yellow : C), and **d)** PtRu/C (Purple : Ni, Grey : Ru, Yellow : C).

**Table S5.** The H<sub>2</sub>O\* adsorption energy (eV) on different surfaces: Ru(001) site of Ni<sub>2</sub>P-Ru, Pt(111) site of Pt/C. The distances (in Å) of interaction between surface and water molecule.

| Configuration                                                   | Adsorption energy of H <sub>2</sub> O ( $\Delta G_{H_2O^*}$ ) (eV) | H <sub>2</sub> O distance from surface (Å) |
|-----------------------------------------------------------------|--------------------------------------------------------------------|--------------------------------------------|
| Ni <sub>2</sub> P-Ru-H <sub>2</sub> O<br>H <sub>2</sub> O on Ru | -0.458                                                             | 2.3                                        |
| Pt(111)-C-H <sub>2</sub> O<br>H <sub>2</sub> O on Pt            | 1.15                                                               | 3.5                                        |

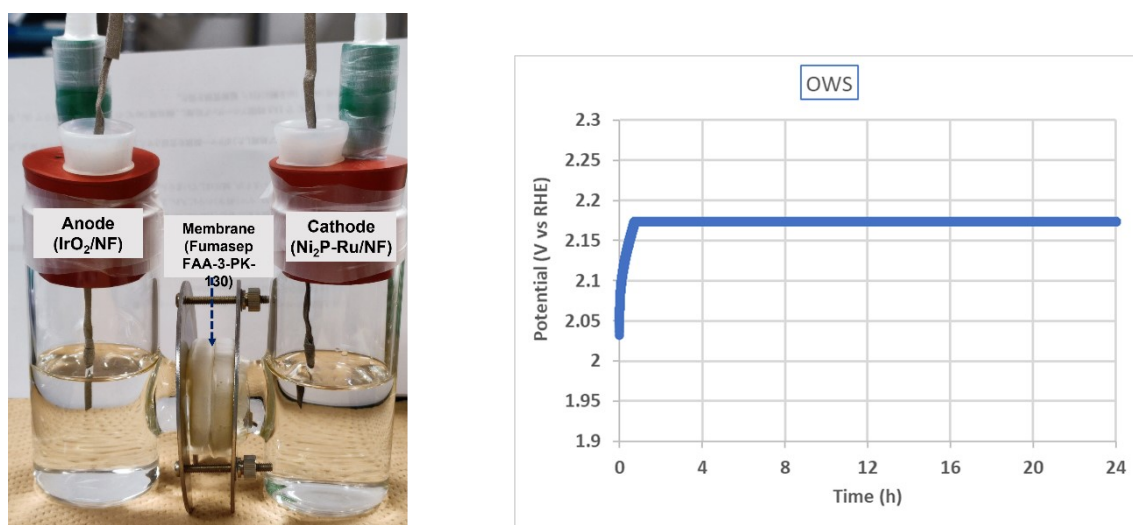

**Figure S17 a)** The H-type cell based overall water splitting (OWS) for qualitative assessment of the Ni<sub>2</sub>P-Ru electrode **b)** Chronopotentiometry curve recorded for 24 h at 100 mA cm<sup>-2</sup> showing the stability of the OWS system in 1M KOH solution.

## References

1. C. Ling, H. Li, C. Yuan, Z. Yang, H. Chong, X. Qian, X. Lu, T. Cheang, A. Xu, Sulfur doped ruthenium nanoparticles as a highly efficient electrocatalyst for the hydrogen evolution reaction in alkaline media, *Catal. Sci. Technol.*, 2021, **11**, 3865–3872.
2. Z. Pu, I. S. Amiin, Z. Kou, W. Li, S. Mu, RuP<sub>2</sub>-Based Catalysts with Platinum-like Activity and Higher Durability for the Hydrogen Evolution Reaction at All pH Values, *Angew. Chem. Int. Ed.*, 2017, **56**, 11559.
3. J. Mahmood, F. Li, S. Jung, M. S. Okyay, I. Ahmad, S. Kim, N. Park, H. Y. Jeong, J. Baek, An efficient and pH-universal ruthenium-based catalyst for the hydrogen evolution reaction, *Nat. Nanotech.*, 2017, **12**, 441.
4. H. Chen, X. Ai, W. Liu, Z. Xie, W. Feng, W. Chen, X. Zo, Promoting Subordinate, Efficient Ruthenium Sites with Interstitial Silicon for Pt-Like Electrocatalytic Activity, *Angew. Chem. Int. Ed.*, 2019, **58**, 11409.
5. Y. T. Li, F. Q. Chu, Y. F. Bu, Y. Kong, Y. X. Tao, X. Zhou, H. R. Yu, J. J. Yu, L. Tang, Y. Qin, Controllable fabrication of uniform ruthenium phosphide nanocrystals for the hydrogen evolution reaction, *Chem. Commun.*, 2019, **55**, 7828–7831.

6. Z. Liu, Z. Li, J. Li, J. Xiong, S. Zhou, J. Liang, W. Cai, C. Wang, Z. Yang, H. Cheng, Engineering of Ru/Ru<sub>2</sub>P interfaces superior to Pt active sites for catalysis of the alkaline hydrogen evolution reaction, *J. Mater. Chem. A*, 2019, 7, 5621–5625.
7. Y. M. Zhao, X. W. Wang, G. Z. Cheng, W. Luo, Phosphorus induced activation of ruthenium for boosting hydrogen oxidation and evolution electrocatalysis, *ACS Catal.*, 2020, 10(20), 11751–11757.
8. X. Liu, F. Liu, J. Yu, G. Xiong, L. Zhao, Y. Sang, S. Zuo, J. Zhang, H. Liu, W. Zhou, Charge redistribution caused by S, P synergistically active Ru endows an ultrahigh hydrogen evolution activity of S-doped RuP embedded in N, P S-doped carbon, *Adv. Sci.* 2020, 7(17), 2001526.
9. J. X. Guo, D. Y. Yan, K. W. Qiu, C. Mu, D. Jiao, H. Wang, T. Ling, High electrocatalytic hydrogen evolution activity on a coupled Ru and CoO hybrid electrocatalyst, *J. Energy Chem.*, 2019, 37, 143–147.
10. H. Song, M. Wu, Z. Tang, J. S. Tse, B. Yang, S. Lu, Single atom ruthenium-doped CoP/CDs nanosheets via splicing of carbon-dots for robust hydrogen production, *Angew. Chem. Int. Ed.*, 2021, 60(13), 7234–7244.
11. K. Wu, K. Sun, S. Liu, W. Cheong, Z. Chen, C. Zhang, Y. Pan, Y. Cheng, Z. Zhuang, X. Wei, Y. Wang, L. Zhang, Q. Zhang, D. Wang, Q. Peng, C. Chen, Y. Li, Atomically dispersed Ni–Ru–P interface sites for high-efficiency pH-universal electrocatalysis of hydrogen evolution, *Nano Energy*, 2021, 80, 105467.
12. Y. Sun, Z. Xue, Q. Liu, Y. Jia, Y. Li, M. Liu, G. Li, C. Su, Modulating electronic structure of metal-organic frameworks by introducing atomically dispersed Ru for efficient hydrogen evolution, *Nat. Commun.*, 2021, 12(1), 1369.
13. P. Bhanja, B. Mohanty, S. Chongdar, A. Bhaumik, B. K. Jena, S. Basu, Novel Microporous Metal Phosphonates as Electrocatalyst for the Electrochemical Hydrogen Evolution Reaction, *ACS Appl. Energy Mater.*, 2021, 4(11), 12827–12835.
14. Y. Qiu, M. Sun, J. Cheng, J. Sun, D. Sun, L. Zhang, Bifunctional Ni-Fe/NiMoN<sub>x</sub> nanosheets on Ni foam for high-efficiency and durable overall water splitting, *Catal. Commun.*, 2022, 164, 106426.
15. J. Dong, Y. Wang, Q. Jiang, Z. Nan, F. R. Fan, Z. Tian, Charged droplet-driven fast formation of nickel–iron (oxy)hydroxides with rich oxygen defects for boosting overall water splitting, *J. Mater. Chem. A*, 2021, 9, 20058–20067.
16. G. Ma, N. Yang, Y. Xue, G. Zhou, X. Wang, Ethylene Glycol Electrochemical Reforming Using Ruthenium Nanoparticle Decorated Nickel Phosphide Ultrathin Nanosheets, *ACS Appl. Mater. Interfaces*, 2021, 13, 42763–42772.
17. Y. Yang, Q. Liu, H. Wang, H. Wen, Z. Peng, K. Xiang, C. Gao, X. Wu, B. Li, Z. Liu, Phosphorus-Doped 3D RuCo Nanowire Arrays on Nickel Foam with Enhanced Electrocatalytic Activity for Overall Water Splitting, *ACS Omega*, 2021, 6, 10234–10241.
18. H. Wang, H. Liu, T. Feng, L. Wang, W. Yuan, Q. Huang, Y. Guo, Electronically modulated nickel boron by CeO<sub>x</sub> doping as a highly efficient electrocatalyst towards overall water splitting, *Dalton Trans.*, 2022, 51, 675–684.
19. L. Li, Y. Lu, X. Liu, X. Wang, S. Zhou, Layered double hydroxide driven ultra-evenly Rh-doped Co<sub>2</sub>Fe-P composite for high-efficient overall water splitting, *J. Alloys and Comp.*, 2022, 895, 1625492.
20. Y. Peng, H. He, Novel heterostructure Cu<sub>2</sub>S/Ni<sub>3</sub>S<sub>2</sub> coral-like nanoarrays on Ni foam to enhance hydrogen evolution reaction in alkaline media, *RSC Adv.*, 2021, 11, 39493–39502.
21. Y. Dong, H. Su, G. Liu, Exploring the electrocatalytic activity of cobalt disulfide nanosheets towards the hydrogen evolution reaction with *in situ* ECAFM, *Sustainable Energy Fuels*, 2021, 5, 4115–4125.

22. S. C. Karthikeyan, R. S. Kumar, S. Ramakrishnan, S. Prabhakaran, A. R. Kim, D. H. Kim, D. J. Yoo, Efficient Alkaline Water/Seawater Electrolysis by Development of Ultra-Low IrO<sub>2</sub> Nanoparticles Decorated on Hierarchical MnO<sub>2</sub>/rGO Nanostructure, *ACS Sustainable Chem. Eng.*, 2022, 10, 15068–15081.
23. S. Li, C. Xi, Y. Z. Jin, D. Wu, J. Q. Wang, T. Liu, H. B. Wang, C. K. Dong, H. Liu, S. A. Kulinich, X. W. Du, Ir-O-V Catalytic Group in Ir-Doped NiV(OH)<sub>2</sub> for Overall Water Splitting, *ACS Energy Lett.*, 2019, 4(8), 1823–1829.
24. F. Lv, W. Zhang, W. Yang, J. Feng, K. Wang, J. Zhou, P. Zhou, S. Guo, Ir-Based Alloy Nanoflowers with Optimized Hydrogen Binding Energy as Bifunctional Electrocatalysts for Overall Water Splitting, *Small Methods*, 2020, 4(6), 1–7.
25. N. Chen, Y. Du, G. Zhang, W. Lu, F. Cao, Amorphous nickel sulfoselenide for efficient electrochemical urea-assisted hydrogen production in alkaline media, *Nano Energy*, 81, 2021, 105605.
26. S. Riyajuddin, K. Azmi, M. Pahuja, S. Kumar, T. Maruyama, C. Bera, K. Ghosh, Super-Hydrophilic Hierarchical Ni-Foam-Graphene-Carbon Nanotubes-Ni<sub>2</sub>P–CuP<sub>2</sub> Nano-Architecture as Efficient Electrocatalyst for Overall Water Splitting, *ACS Nano*, 2021, 15(3), 5586–5599.
27. J. Dong, Y. Wang, Q. Jiang, Z. Nan, F. R. Fan, Z. Tian, Charged droplet-driven fast formation of nickel–iron (oxy)hydroxides with rich oxygen defects for boosting overall water splitting, *J. Mater. Chem. A*, 2021, 9, 20058–20067.
28. N. K. Oh, J. Seo, S. Lee, H. Kim, U. Kim, J. Lee, Y. Han, H. Park, Highly efficient and robust noble-metal free bifunctional water electrolysis catalyst achieved via complementary charge transfer, *Nat. Commun.*, 2021, 12, 4606.
29. W. Lai, L. Zhang, W. Hua, S. Indris, Z. Yan, Z. Hu, B. Zhang, Y. Liu, L. Wang, M. Liu, R. Liu, Y. Wang, J. Wang, Z. Hu, H. Liu, S. Chou, S. Dou, General  $\pi$ -Electron-Assisted Strategy for Ir, Pt, Ru, Pd, Fe, Ni Single-Atom Electrocatalysts with Bifunctional Active Sites for Highly Efficient Water Splitting, *Angew. Chem. Int. Ed.*, 2019, 58(34), 11868–11873.
30. C. Wang, F. Wang, S. Qiu, J. Gao, L. Gu, K. Wang, P. Zuo, K. Sun, X. Zhu, Integrating Co<sub>3</sub>O<sub>4</sub> Nanoparticles with MnO<sub>2</sub> Nanosheets as Bifunctional Electrocatalysts for Water Splitting, *Int. J. Hydrogen Energy*, 2021, 46(17), 10356–10365.
31. H. Zhang, X. Wu, C. Chen, C. Lv, H. Liu, Y. Lv, J. Guo, J. Li, D. Jia, F. Tong, Spontaneous ruthenium doping in hierarchical flower-like Ni<sub>2</sub>P/NiO heterostructure nanosheets for superb alkaline hydrogen evolution, *Chem. Eng. J.*, 2021, 417, 128069.
